# Supplementary figures and images for: Control of the compositions and morphologies of uranium oxide nanocrystals in the solution phase: multi-monomer growth and self-catalysis
Source: Royal Society of Chemistry journal article supplement (doi:10.1039/c8na00392k), 2019-01-01

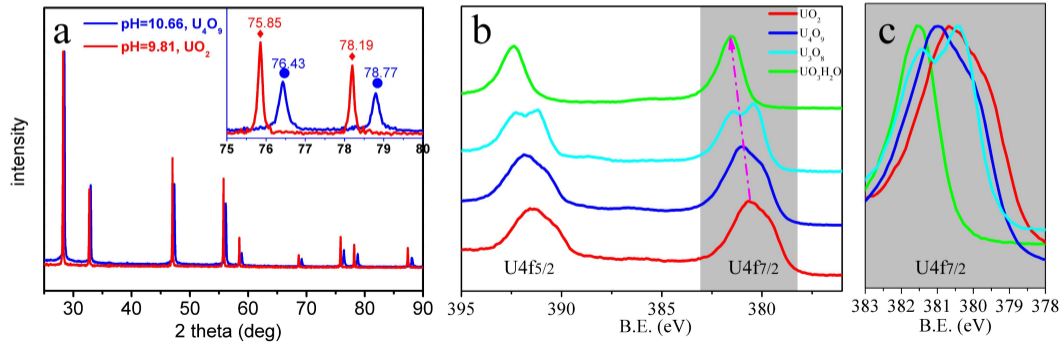

Supplement: c8na00392k2.pdf [file c8na00392k2.pdf]

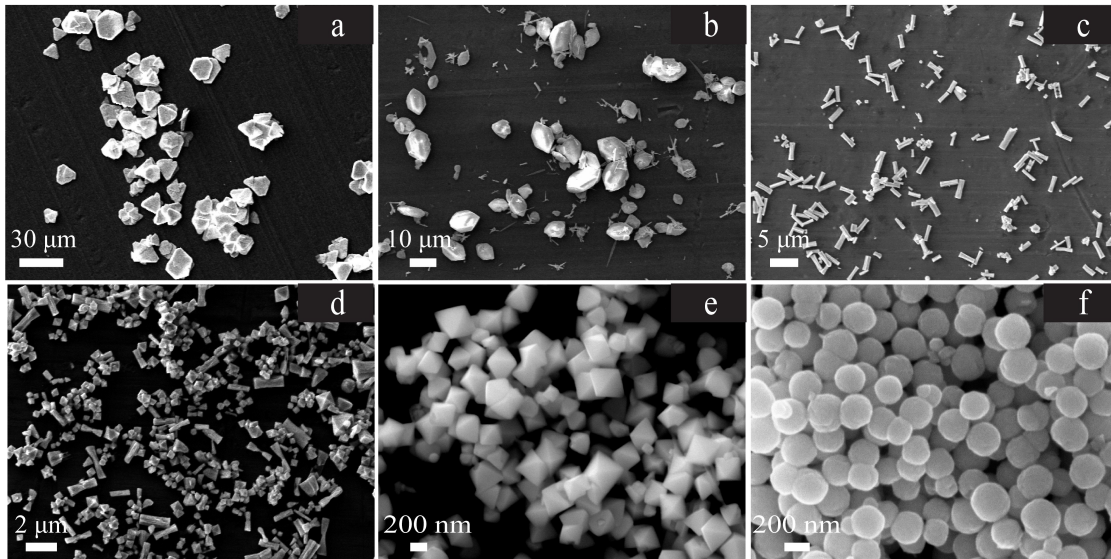

Supplement: c8na00392k3.pdf [file c8na00392k3.pdf]

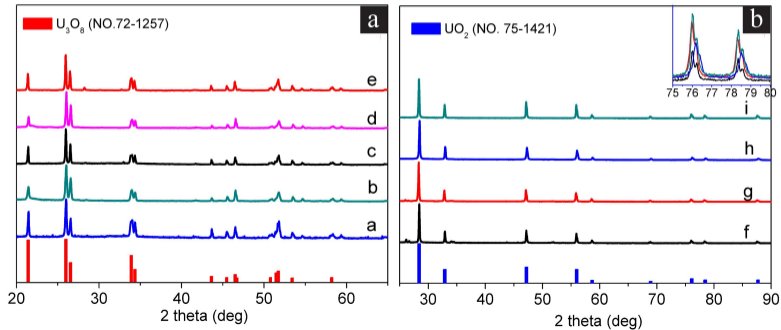

Supplement: c8na00392k4.pdf [file c8na00392k4.pdf]

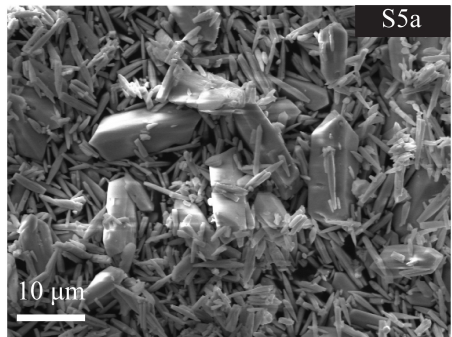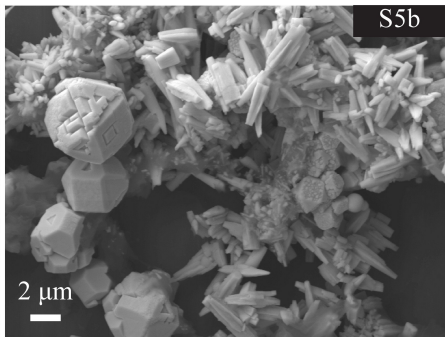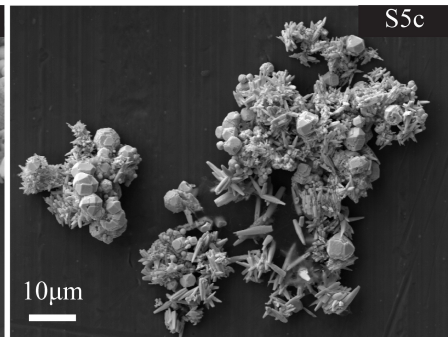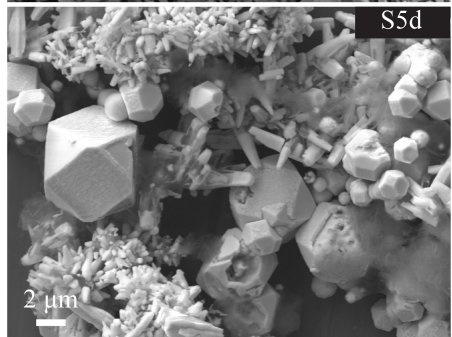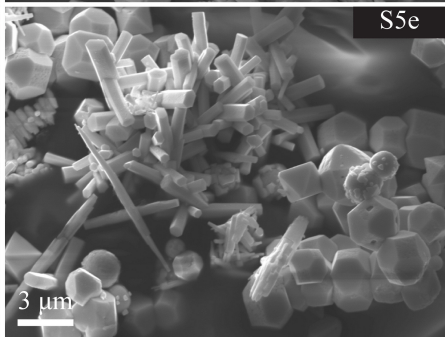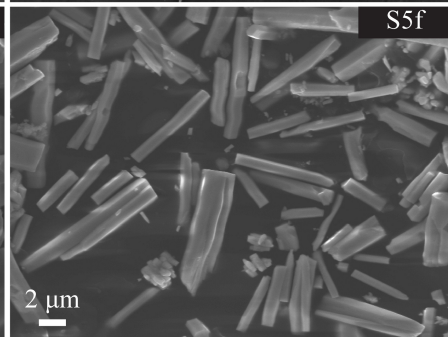

Supplement: c8na00392k6.pdf [file c8na00392k6.pdf]
